# Supplementary material for: Excellent ratiometric two-photon fluorescent probes for hydrogen sulfide detection based on the fluorescence resonance energy transfer mechanism
Source: Royal Society of Chemistry journal article supplement (doi:10.1039/d3cp05329f), 2024-01-01
Supplement: d3cp05329f1.pdf [file d3cp05329f1.pdf]

## Supporting Information

### Excellent Ratiometric Two-Photon Fluorescent Probes for Hydrogen Sulfide Detection based on the Fluorescence Resonance Energy

#### Transfer Mechanism

Xue-Xue Ma, Ming-Hui Geng, Xia-Yu Cheng, Tong-Shu Zhang, Zong-Liang Li  
and Ke Zhao\*

School of Physics and Electronics, Shandong Normal University, Jinan 250358, People's Republic of  
China

\*Corresponding author: Ke Zhao

E-mail: zhaoke@sdu.edu.cn

#### Table of Contents

1. The theoretical basis of two-photon absorption cross section.
2. Table S1 One-photon absorption properties of various energy acceptors.
3. Figure S1 Chemical structures of energy donors and acceptors.
4. Table S2 Optimized geometries of studied molecules.
5. Table S3 One-photon absorption and emission properties of studied molecules.
6. Figure S2 Graphical representation of charge transfer.
7. Table S4 The ISC rates for spin substates.
8. Figure S3 Absorption and emission process of BCD4.
9. Figure S4 Spectral overlap between donor emission and acceptor absorption.
10. Figure S5 Distance between energy donors and acceptors.
11. Figure S6 Molecular orbitals involved in the two-photon absorption process of product molecules.
12. Table S5 Two-photon absorption properties of energy donors and acceptors.
13. Figure S7 Two-photon absorption spectrum of BCD4.
14. Cartesian coordinates of the optimized ground state structures.
15. Cartesian coordinates of the optimized excited state structures.

References

## Two-photon Absorption Cross Section

The TPA cross section can be calculated by using the TP transition matrix element  $S_{\alpha\beta}$  of the initial state  $|i\rangle$  and the final state  $|f\rangle$ . Ignoring the influence of non-resonant absorption,  $S_{\alpha\beta}$  can be expressed as<sup>1</sup>

$$S_{\alpha\beta} = \sum_s \left( \frac{\langle i | \mu_\alpha | s \rangle \langle s | \mu_\beta | f \rangle}{\omega_s - \omega} + \frac{\langle i | \mu_\beta | s \rangle \langle s | \mu_\alpha | f \rangle}{\omega_s - \omega} \right) \quad (1)$$

Where  $\mu_{\alpha(\beta)}$  is electric dipole moment operator,  $\alpha, \beta \in (x, y, z)$ .  $\omega$  is the fundamental frequency of the laser, the resonance condition can be assumed to be  $2\omega = \omega_f$ . The summation include all initial, intermediate and final electronic states. In the response theory, the TP matrix element can be calculated through the single residues of the quadratic response function.<sup>2</sup>

When a molecular material is excited by monochromatic polarized light, the microscopic TPA cross section ( $\delta$ ) can be expressed as<sup>1,3</sup>

$$\delta = \sum_{\alpha\beta} (2S_{\alpha\alpha}S_{\beta\beta}^* + 4S_{\alpha\beta}S_{\alpha\beta}^*) \quad (2)$$

The macroscopic TPA cross section ( $\sigma$ ) can be directly compared with the experimental data. It is defined as<sup>1</sup>

$$\sigma = \frac{4\pi^2 \alpha a_0^5 \omega^2}{15c\Gamma} \delta \quad (3)$$

where  $\alpha$  is the fine structure constant,  $a_0$  is the Bohr radius,  $\omega$  is the photon energy in atomic units,  $c$  is the speed of light, and  $\Gamma$  is the broadening factor which is assumed to be 0.1 eV.<sup>4</sup>

Table S1 One-photon absorption properties of various energy acceptors.

| Molecular structure                                                                 | $\lambda_{op}(nm)$ | $f_{op}$    | Molecular structure                                                                  | $\lambda_{op}(nm)$ | $f_{op}$    |
|-------------------------------------------------------------------------------------|--------------------|-------------|--------------------------------------------------------------------------------------|--------------------|-------------|
| 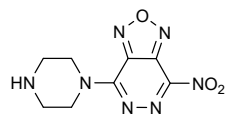   | 394                | 0.19        |    | 418                | 0.65        |
|    | 399                | 0.58        |    | 488                | 0.15        |
|    | 428                | 0.18        |    | 381                | 0.91        |
|    | 378                | 0.32        |   | 442                | 0.15        |
|  | 346                | 0.03        |  | 498                | 0.35        |
|  | 385                | 0.60        |  | 402                | 0.50        |
|  | 444                | 0.97        |  | 437                | 0.57        |
|  | <b>439</b>         | <b>0.59</b> |  | <b>507</b>         | <b>0.39</b> |
|  | 428                | 0.48        |  | 487                | 0.14        |
|  | 413                | 0.59        |  | 443                | 0.53        |

|                                                                                    |     |      |                                                                                    |     |      |
|------------------------------------------------------------------------------------|-----|------|------------------------------------------------------------------------------------|-----|------|
| 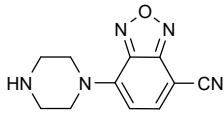  | 395 | 0.36 |  | 432 | 0.17 |
|   | 406 | 0.62 |  | 389 | 0.67 |
|   | 410 | 0.64 |  | 388 | 0.52 |
|   | 389 | 0.46 |  | 353 | 0.49 |
|  | 447 | 0.58 |                                                                                    |     |      |

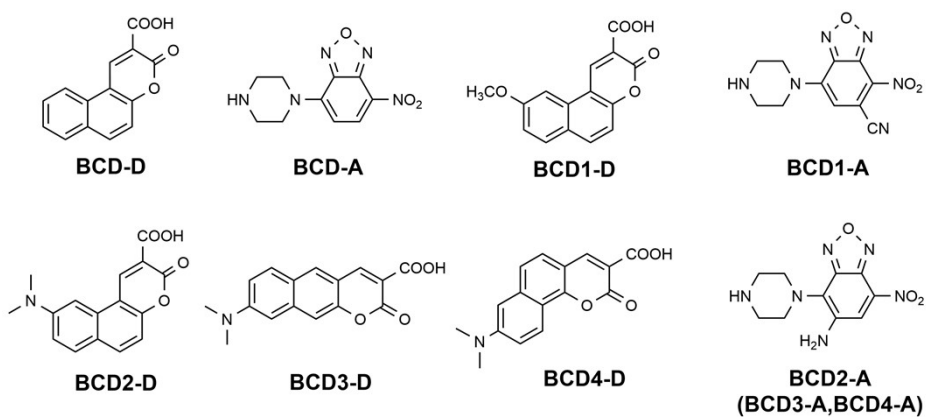

Figure S1 Chemical structures of energy donors and acceptors.

Table S2 Optimized geometries of studied molecules.

| Energy donor                                                                                  | Energy acceptor                                                                               | Probe molecule                                                                               | Product molecule                                                                                               |
|-----------------------------------------------------------------------------------------------|-----------------------------------------------------------------------------------------------|----------------------------------------------------------------------------------------------|----------------------------------------------------------------------------------------------------------------|
| 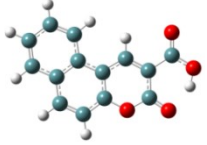<br>BCD-D    | <br>BCD-A    | <br>BCD    | <br>BCD-H <sub>2</sub> S    |
| <br>BCD1-D   | <br>BCD1-A   | <br>BCD1   | <br>BCD1-H <sub>2</sub> S   |
| <br>BCD2-D  | <br>BCD2-A   | <br>BCD2   | <br>BCD2-H <sub>2</sub> S  |
| <br>BCD3-D | <br>BCD3-A | <br>BCD3 | <br>BCD3-H <sub>2</sub> S |
| <br>BCD4-D | <br>BCD4-A | <br>BCD4 | <br>BCD4-H <sub>2</sub> S |

Table S3 One-photon absorption and emission properties of studied molecules.

|                               | $\lambda_{op}(nm)$      | $f_{op}$ | Transition                     | $\lambda_{em}(nm)$      | $f_{em}$ | Transition                     |
|-------------------------------|-------------------------|----------|--------------------------------|-------------------------|----------|--------------------------------|
| BCD-D                         | 346(360) <sup>exp</sup> | 0.44     | S <sub>0</sub> →S <sub>1</sub> | 415(440) <sup>exp</sup> | 0.67     | S <sub>1</sub> →S <sub>0</sub> |
| BCD-A                         | 415(490) <sup>exp</sup> | 0.58     | S <sub>0</sub> →S <sub>1</sub> | 527(555) <sup>exp</sup> | 0.65     | S <sub>1</sub> →S <sub>0</sub> |
| BCD                           | 405                     | 0.67     | S <sub>0</sub> →S <sub>1</sub> | 477                     | 0.72     | S <sub>1</sub> →S <sub>0</sub> |
|                               | 327                     | 0.45     | S <sub>0</sub> →S <sub>2</sub> |                         |          |                                |
| BCD-H <sub>2</sub> S          | 325                     | 0.47     | S <sub>0</sub> →S <sub>1</sub> | 402                     | 0.71     | S <sub>1</sub> →S <sub>0</sub> |
| BCD1-D                        | 357                     | 0.43     | S <sub>0</sub> →S <sub>1</sub> | 437                     | 0.66     | S <sub>1</sub> →S <sub>0</sub> |
| BCD1-A                        | 439                     | 0.59     | S <sub>0</sub> →S <sub>1</sub> | 587                     | 0.62     | S <sub>1</sub> →S <sub>0</sub> |
| BCD1                          | 428                     | 0.67     | S <sub>0</sub> →S <sub>1</sub> | 500                     | 0.75     | S <sub>1</sub> →S <sub>0</sub> |
|                               | 333                     | 0.46     | S <sub>0</sub> →S <sub>2</sub> |                         |          |                                |
| BCD1-H <sub>2</sub> S         | 330                     | 0.49     | S <sub>0</sub> →S <sub>1</sub> | 414                     | 0.75     | S <sub>1</sub> →S <sub>0</sub> |
| BCD2-D                        | 426                     | 0.36     | S <sub>0</sub> →S <sub>1</sub> | 514                     | 0.57     | S <sub>1</sub> →S <sub>0</sub> |
| BCD2-A<br>(BCD3-A,<br>BCD4-A) | 507                     | 0.39     | S <sub>0</sub> →S <sub>1</sub> | 655                     | 0.45     | S <sub>1</sub> →S <sub>0</sub> |
| BCD2                          | 497                     | 0.38     | S <sub>0</sub> →S <sub>1</sub> | 638                     | 0.44     | S <sub>1</sub> →S <sub>0</sub> |
|                               | 382                     | 0.41     | S <sub>0</sub> →S <sub>2</sub> |                         |          |                                |
| BCD2-H <sub>2</sub> S         | 378                     | 0.41     | S <sub>0</sub> →S <sub>1</sub> | 475                     | 0.67     | S <sub>1</sub> →S <sub>0</sub> |
| BCD3-D                        | 410                     | 0.83     | S <sub>0</sub> →S <sub>1</sub> | 489                     | 1.19     | S <sub>1</sub> →S <sub>0</sub> |
| BCD3                          | 498                     | 0.38     | S <sub>0</sub> →S <sub>1</sub> | 639                     | 0.45     | S <sub>1</sub> →S <sub>0</sub> |
|                               | 377                     | 0.78     | S <sub>0</sub> →S <sub>2</sub> |                         |          |                                |
| BCD3-H <sub>2</sub> S         | 375                     | 0.77     | S <sub>0</sub> →S <sub>1</sub> | 463                     | 1.20     | S <sub>1</sub> →S <sub>0</sub> |
| BCD4-D                        | 391                     | 0.83     | S <sub>0</sub> →S <sub>1</sub> | 457                     | 1.19     | S <sub>1</sub> →S <sub>0</sub> |
| BCD4                          | 491                     | 0.41     | S <sub>0</sub> →S <sub>1</sub> | 639                     | 0.44     | S <sub>1</sub> →S <sub>0</sub> |
|                               | 363                     | 0.77     | S <sub>0</sub> →S <sub>2</sub> |                         |          |                                |
| BCD4-H <sub>2</sub> S         | 360                     | 0.76     | S <sub>0</sub> →S <sub>1</sub> | 435                     | 1.13     | S <sub>1</sub> →S <sub>0</sub> |

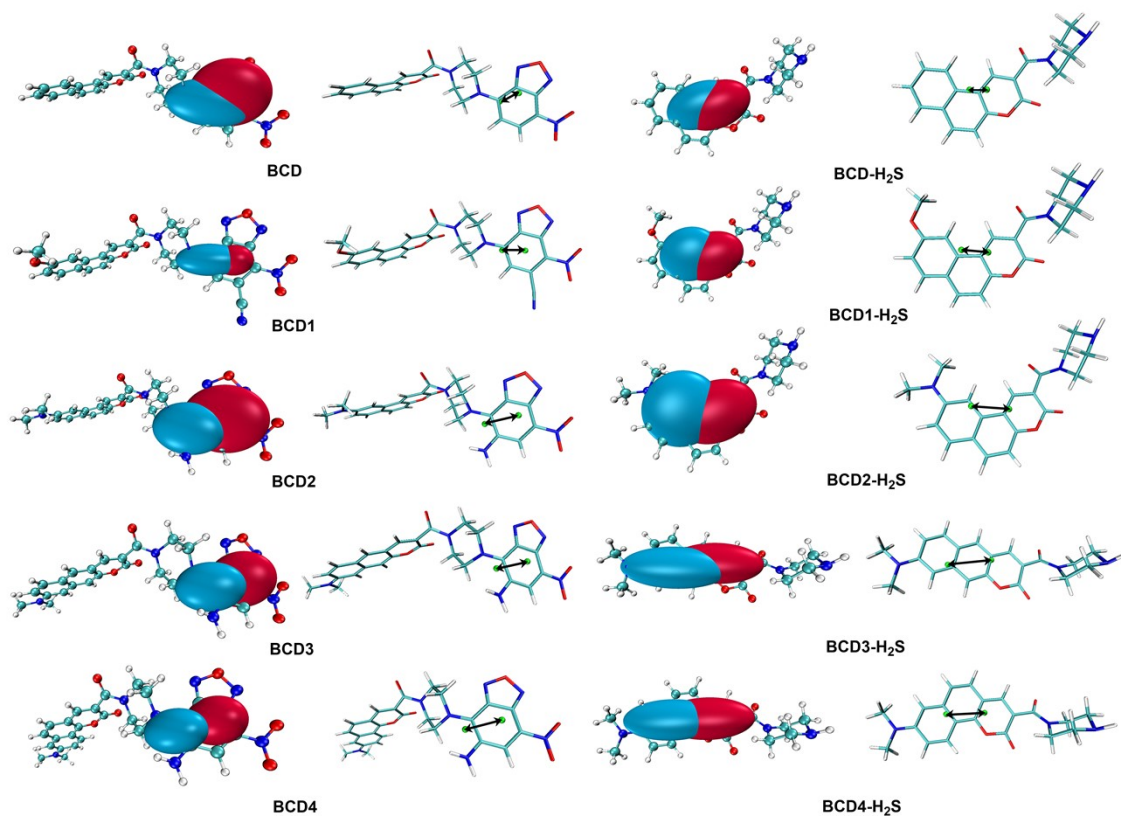

Figure S2 Contour map of the electron density difference between the ground state and the first excited state, and the barycenters of positive and negative electronic densities computed at the first excited state minimal energy structures. Blue and red indicate decrease and increase in the electron density (isocontour value 0.0007 a.u.).

Table S4 The ISC rates for spin substates.

| MS                         | $k_{isc}^{S_1-T_1}$ (s <sup>-1</sup> ) |                      |                      | $k_{isc}^{S_1-T_2}$ (s <sup>-1</sup> ) |                      |                      |
|----------------------------|----------------------------------------|----------------------|----------------------|----------------------------------------|----------------------|----------------------|
|                            | 0                                      | -1                   | 1                    | 0                                      | -1                   | 1                    |
| <b>BCD</b>                 | 6.93×10 <sup>6</sup>                   | 3.89×10 <sup>7</sup> | 3.48×10 <sup>7</sup> | 6.07×10 <sup>8</sup>                   | 4.04×10 <sup>8</sup> | 4.04×10 <sup>8</sup> |
| <b>BCD-H<sub>2</sub>S</b>  | 1.31×10 <sup>8</sup>                   | 1.18×10 <sup>8</sup> | 1.18×10 <sup>8</sup> | 5.27×10 <sup>8</sup>                   | 2.04×10 <sup>8</sup> | 2.04×10 <sup>8</sup> |
| <b>BCD1</b>                | 1.11×10 <sup>6</sup>                   | 1.55×10 <sup>7</sup> | 1.55×10 <sup>7</sup> | 3.09×10 <sup>7</sup>                   | 8.43×10 <sup>7</sup> | 8.45×10 <sup>7</sup> |
| <b>BCD1-H<sub>2</sub>S</b> | 9.07×10 <sup>7</sup>                   | 6.72×10 <sup>7</sup> | 6.72×10 <sup>7</sup> | 1.64×10 <sup>9</sup>                   | 1.24×10 <sup>9</sup> | 1.29×10 <sup>9</sup> |
| <b>BCD2</b>                | 7.87×10 <sup>5</sup>                   | 2.86×10 <sup>5</sup> | 3.14×10 <sup>5</sup> | 4.71×10 <sup>6</sup>                   | 2.66×10 <sup>6</sup> | 2.43×10 <sup>6</sup> |
| <b>BCD2-H<sub>2</sub>S</b> | 1.07×10 <sup>8</sup>                   | 3.83×10 <sup>6</sup> | 3.28×10 <sup>6</sup> | 2.73×10 <sup>7</sup>                   | 4.74×10 <sup>6</sup> | 5.19×10 <sup>6</sup> |
| <b>BCD3</b>                | 4.98×10 <sup>4</sup>                   | 2.43×10 <sup>5</sup> | 2.36×10 <sup>5</sup> | 1.89×10 <sup>6</sup>                   | 7.43×10 <sup>6</sup> | 7.51×10 <sup>6</sup> |
| <b>BCD3-H<sub>2</sub>S</b> | 6.64×10 <sup>7</sup>                   | 9.54×10 <sup>6</sup> | 1.03×10 <sup>7</sup> | 2.54×10 <sup>5</sup>                   | 8.69×10 <sup>5</sup> | 8.32×10 <sup>5</sup> |
| <b>BCD4</b>                | 4.46×10 <sup>4</sup>                   | 3.21×10 <sup>5</sup> | 3.14×10 <sup>5</sup> | 1.19×10 <sup>6</sup>                   | 4.62×10 <sup>6</sup> | 4.62×10 <sup>6</sup> |
| <b>BCD4-H<sub>2</sub>S</b> | 3.06×10 <sup>8</sup>                   | 4.35×10 <sup>7</sup> | 5.95×10 <sup>7</sup> | 8.79×10 <sup>7</sup>                   | 1.23×10 <sup>7</sup> | 8.69×10 <sup>6</sup> |

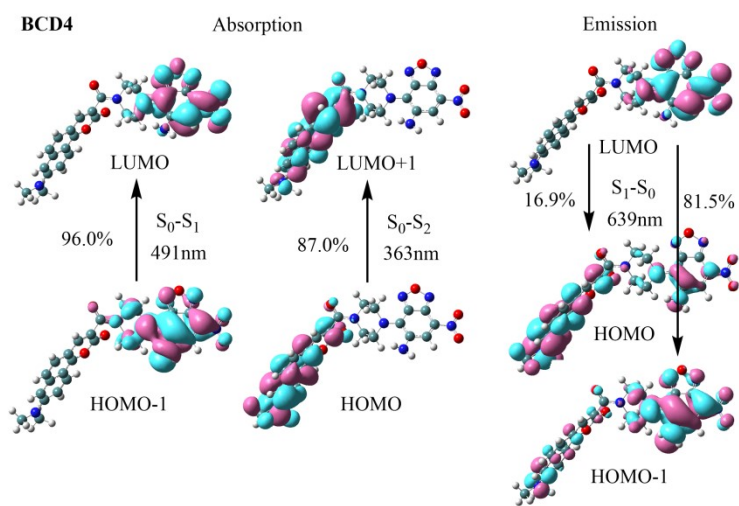

Figure S3 Absorption and emission process of **BCD4**.

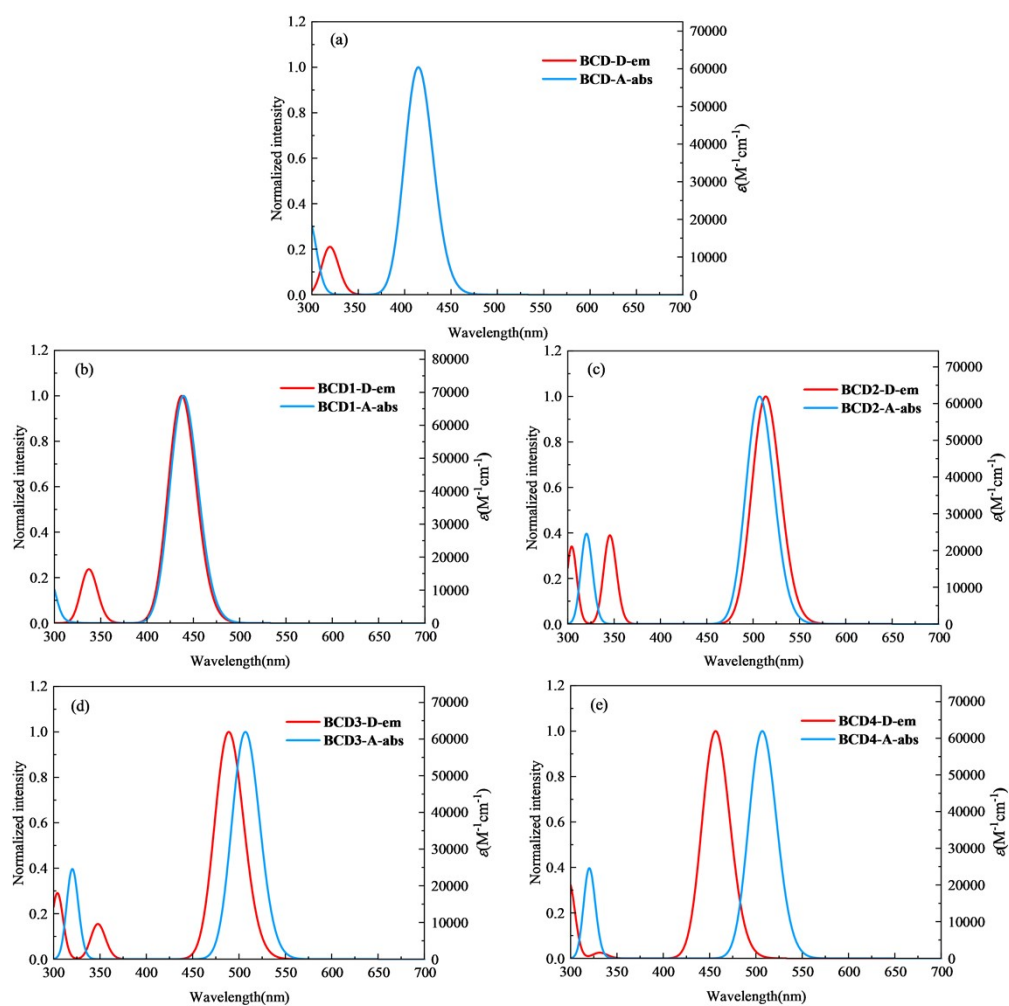

Figure S4 Spectral overlap between donor emission and acceptor absorption.



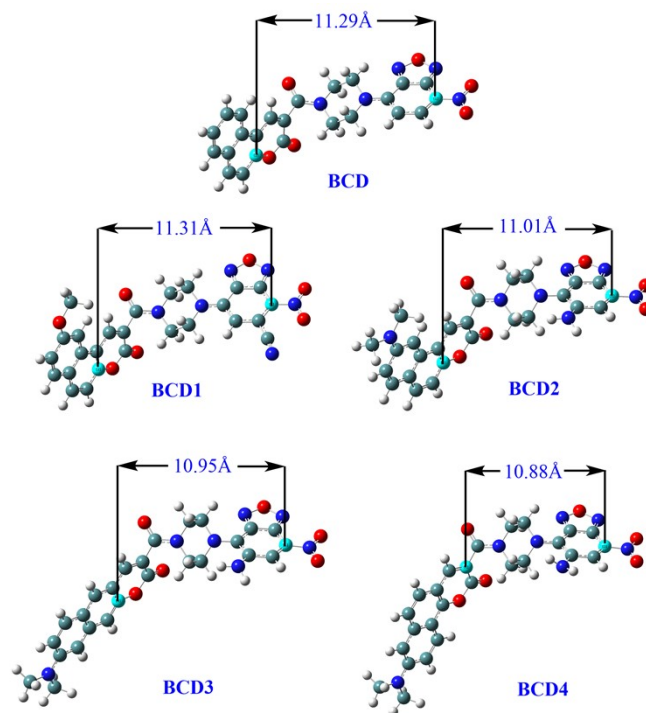

Figure S5 Distance between energy donors and acceptors.

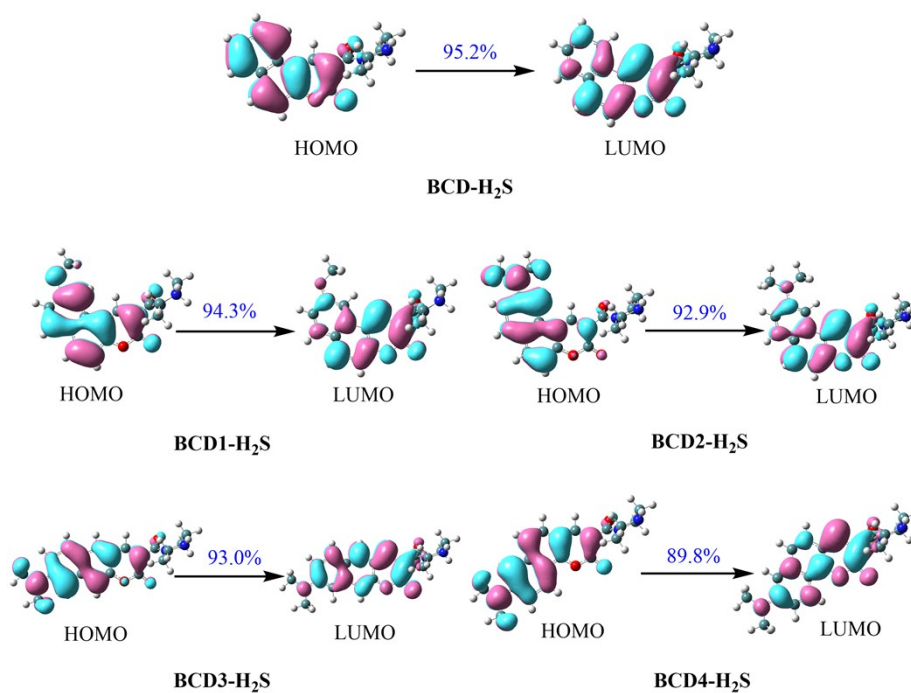

Figure S6 Molecular orbitals involved in the two-photon absorption process of product molecules.

Table S5 Two-photon absorption properties of energy donors and acceptors.

|        | State          | $\lambda_{tp}(nm)$ | $\sigma(GM)$ |          | State          | $\lambda_{tp}(nm)$ | $\sigma(GM)$ |
|--------|----------------|--------------------|--------------|----------|----------------|--------------------|--------------|
| BCD-D  | S <sub>1</sub> | 711                | 30           | BCD-A    | S <sub>1</sub> | 859                | 35           |
| BCD1-D | S <sub>1</sub> | 730                | 53           | BCD1-A   | S <sub>1</sub> | 909                | 46           |
| BCD2-D | S <sub>1</sub> | 862                | 118          | BCD2-A   | S <sub>1</sub> | 1048               | 76           |
| BCD3-D | S <sub>1</sub> | 841                | 360          | (BCD3-A, |                |                    |              |
| BCD4-D | S <sub>1</sub> | 803                | 298          | BCD4-A)  |                |                    |              |

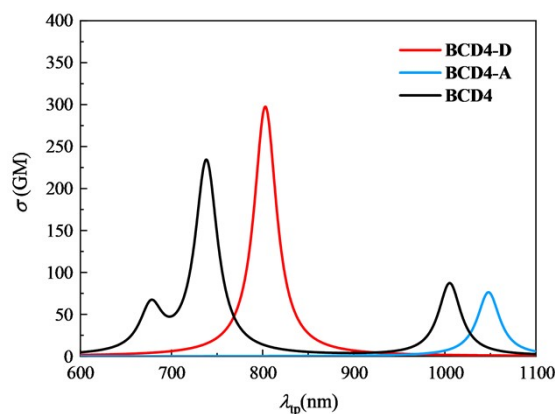

Figure S7 Two-photon absorption spectrum of **BCD4**.

Cartesian coordinates of the optimized ground state structures obtained with the PCM//CAM-B3LYP/6-31+G (d) in water solvent.

#### BCD

|   |             |             |             |
|---|-------------|-------------|-------------|
| C | -6.51094600 | 2.07742300  | -2.46467700 |
| C | -5.55440600 | 1.26439200  | -1.90278200 |
| C | -5.66425000 | 0.83998100  | -0.55733000 |
| C | -6.78485500 | 1.27513500  | 0.20022400  |
| C | -7.75396000 | 2.11249900  | -0.40392000 |
| C | -7.62309700 | 2.50816200  | -1.71195400 |
| H | -6.40759200 | 2.39067800  | -3.49895200 |
| H | -4.71141200 | 0.95139800  | -2.50805800 |
| C | -4.69248200 | -0.01258400 | 0.07942500  |
| C | -6.92041600 | 0.86428400  | 1.55867900  |
| H | -8.60491400 | 2.43633100  | 0.18863900  |
| H | -8.37013500 | 3.14977800  | -2.16829400 |
| C | -5.99678500 | 0.05728900  | 2.15671700  |
| C | -4.88734200 | -0.37270500 | 1.40113600  |
| H | -7.78337600 | 1.20738900  | 2.12150600  |
| H | -6.08990300 | -0.26188600 | 3.18860900  |

|   |             |             |             |
|---|-------------|-------------|-------------|
| C | -3.52033100 | -0.52758100 | -0.56214400 |
| O | -4.00415500 | -1.17989400 | 2.05353100  |
| O | -2.16764100 | -2.40678500 | 2.15894300  |
| C | -2.62706000 | -1.30173400 | 0.10012600  |
| O | -1.66812400 | -2.64522100 | -1.59004100 |
| C | -2.86977100 | -1.68257700 | 1.47930600  |
| N | -0.21157300 | -1.59721200 | -0.19905200 |
| N | 2.30332100  | -0.26055500 | -0.21111000 |
| C | 0.95414800  | -2.24261800 | -0.78676400 |
| C | 1.94445300  | -1.20105000 | -1.28281100 |
| C | 0.12092200  | -0.66186800 | 0.86300600  |
| C | 1.13071100  | 0.38088800  | 0.38534500  |
| C | -1.45611200 | -1.90239900 | -0.62685000 |
| C | 3.53584100  | 0.26809200  | -0.05901200 |
| C | 4.74544200  | -0.43522000 | -0.47486100 |
| C | 6.06545400  | 0.09767600  | -0.26744600 |
| C | 6.21675300  | 1.37197100  | 0.35453300  |
| C | 5.06406900  | 2.02275900  | 0.73946100  |
| C | 3.77770600  | 1.50438400  | 0.54993800  |
| N | 4.87042200  | -1.61895900 | -1.02186000 |
| N | 6.93836300  | -0.77822200 | -0.70754800 |
| O | 6.18878700  | -1.82264300 | -1.16645600 |
| N | 7.48759700  | 1.96452200  | 0.57055600  |
| O | 7.54758400  | 3.06409400  | 1.13051600  |
| O | 8.48744400  | 1.35321300  | 0.18661600  |
| H | 1.42636000  | -2.88075900 | -0.02980000 |
| H | 0.62698900  | -2.86505000 | -1.61766200 |
| H | 1.49303400  | -0.62213300 | -2.09952500 |
| H | 2.83078600  | -1.69810800 | -1.66172500 |
| H | -0.77105900 | -0.13567400 | 1.19813400  |
| H | 0.53322100  | -1.21548800 | 1.71401000  |
| H | 1.42869200  | 0.96183800  | 1.25537000  |
| H | 0.66710100  | 1.05623900  | -0.34545800 |
| H | 5.16063300  | 2.99895100  | 1.19997700  |
| H | 2.95130400  | 2.12580300  | 0.86162700  |
| H | -3.32990000 | -0.29603500 | -1.60423700 |

### BCD1

|   |             |            |             |
|---|-------------|------------|-------------|
| C | -6.74087400 | 1.79810400 | -1.55480400 |
| C | -5.68888400 | 0.99515800 | -1.16818100 |
| C | -5.63448400 | 0.47862600 | 0.14918200  |
| C | -6.67190100 | 0.79919000 | 1.06328300  |
| C | -7.73843000 | 1.62919900 | 0.62895100  |
| C | -7.77860500 | 2.11893600 | -0.64526100 |
| H | -4.90385900 | 0.76058500 | -1.87287600 |

|   |             |             |             |
|---|-------------|-------------|-------------|
| C | -4.56080300 | -0.36537100 | 0.60748400  |
| C | -6.63226700 | 0.29224300  | 2.38994100  |
| H | -8.53100100 | 1.87230600  | 1.33070200  |
| H | -8.59026200 | 2.75349800  | -0.98500500 |
| C | -5.61065200 | -0.50700600 | 2.82237700  |
| C | -4.58349100 | -0.82433800 | 1.91596400  |
| H | -7.43870500 | 0.55188100  | 3.06942700  |
| H | -5.56976800 | -0.89997200 | 3.83175300  |
| C | -3.45273400 | -0.77769700 | -0.19819500 |
| O | -3.59387800 | -1.62777800 | 2.39935200  |
| O | -1.70719700 | -2.76359400 | 2.20502700  |
| C | -2.45260000 | -1.54676100 | 0.29829000  |
| O | -1.65532600 | -2.69615600 | -1.60508300 |
| C | -2.51446300 | -2.03185400 | 1.66392700  |
| N | -0.07775500 | -1.72503800 | -0.29399300 |
| N | 2.41236800  | -0.34482600 | -0.43397700 |
| C | 1.02587100  | -2.28480900 | -1.06114000 |
| C | 1.94770600  | -1.17898400 | -1.55285700 |
| C | 0.34872400  | -0.87745800 | 0.80675800  |
| C | 1.29271900  | 0.22384200  | 0.32309900  |
| C | -1.35648400 | -2.03592600 | -0.60577800 |
| C | 3.67673400  | 0.06260700  | -0.25736500 |
| C | 4.82232400  | -0.59527100 | -0.87273600 |
| C | 6.17470100  | -0.17206800 | -0.63929700 |
| C | 6.45355300  | 0.94030300  | 0.20768300  |
| C | 5.34821500  | 1.56412900  | 0.78023000  |
| C | 4.02599100  | 1.14906600  | 0.56150400  |
| N | 4.85692800  | -1.64466200 | -1.65690200 |
| N | 6.97685400  | -0.97697400 | -1.29995100 |
| O | 6.15176700  | -1.86795300 | -1.91491000 |
| N | 7.78395900  | 1.37061900  | 0.44335500  |
| O | 7.97278900  | 2.32878500  | 1.19778900  |
| O | 8.69599500  | 0.76547100  | -0.11952800 |
| H | 1.58318400  | -2.98558700 | -0.42760500 |
| H | 0.61933300  | -2.82732000 | -1.91282700 |
| H | 1.40440300  | -0.52250600 | -2.24355200 |
| H | 2.78928800  | -1.61338000 | -2.07985200 |
| H | -0.51107900 | -0.39664400 | 1.26988300  |
| H | 0.85006500  | -1.48961500 | 1.56453700  |
| H | 1.65356200  | 0.74795100  | 1.20338400  |
| H | 0.75794800  | 0.93674200  | -0.31522700 |
| H | 3.25600300  | 1.73951700  | 1.03239700  |
| H | -3.39676100 | -0.47234300 | -1.23721300 |
| C | 5.46308100  | 2.71539800  | 1.64105400  |

|   |             |            |             |
|---|-------------|------------|-------------|
| N | 5.39272100  | 3.63419100 | 2.33914200  |
| O | -6.88038900 | 2.33715000 | -2.79026800 |
| C | -5.88434500 | 2.06651200 | -3.77020500 |
| H | -4.90769500 | 2.44298500 | -3.44917000 |
| H | -5.82036100 | 0.99326800 | -3.97593600 |
| H | -6.20152500 | 2.59346000 | -4.66901900 |

**BCD2**

|   |             |             |             |
|---|-------------|-------------|-------------|
| C | 6.64986500  | 1.62069300  | 0.00403800  |
| C | 5.46586500  | 0.90216500  | 0.19890600  |
| C | 5.21825800  | -0.31235800 | -0.46690500 |
| C | 6.19238600  | -0.83032100 | -1.36471200 |
| C | 7.38839500  | -0.09456100 | -1.55240200 |
| C | 7.61959300  | 1.08356700  | -0.89982300 |
| H | 4.72212400  | 1.29114300  | 0.87890600  |
| C | 4.00374600  | -1.07273300 | -0.28176300 |
| C | 5.96038600  | -2.05144800 | -2.04678200 |
| H | 8.13842400  | -0.48421000 | -2.23540800 |
| H | 8.54934800  | 1.60887700  | -1.07563600 |
| C | 4.80720400  | -2.76816700 | -1.86908500 |
| C | 3.84263200  | -2.26011300 | -0.98167600 |
| H | 6.72410100  | -2.41999700 | -2.72596700 |
| H | 4.61909000  | -3.70319500 | -2.38398100 |
| C | 2.93455800  | -0.69150800 | 0.58540000  |
| O | 2.71564900  | -3.01529700 | -0.83625900 |
| O | 0.73058800  | -3.44969100 | 0.03360000  |
| C | 1.79992000  | -1.42761400 | 0.69943800  |
| O | 1.05260900  | -0.95805400 | 2.89008100  |
| C | 1.66980100  | -2.67655700 | -0.02292600 |
| N | -0.50568000 | -0.79250200 | 1.24595500  |
| N | -2.68378500 | 0.84795700  | 0.45071600  |
| C | -1.59637200 | -0.54656600 | 2.18647700  |
| C | -2.29109900 | 0.77080300  | 1.85437300  |
| C | -0.91288300 | -0.76051400 | -0.15292500 |
| C | -1.59043900 | 0.57304600  | -0.47791400 |
| C | 0.74284600  | -1.04077100 | 1.69556000  |
| C | -4.00081300 | 0.84111100  | 0.03225200  |
| C | -5.00848000 | 0.03331800  | 0.66638000  |
| C | -6.37118100 | -0.02701700 | 0.22069500  |
| C | -6.74431400 | 0.76071100  | -0.90839700 |
| C | -5.79166200 | 1.55269100  | -1.48319900 |
| C | -4.44221300 | 1.63078900  | -1.02835600 |
| N | -4.87998400 | -0.78632900 | 1.68465300  |
| N | -7.02677300 | -0.86984200 | 0.98238200  |
| O | -6.10760700 | -1.32531700 | 1.87244900  |

|   |             |             |             |
|---|-------------|-------------|-------------|
| N | -8.08246000 | 0.75998500  | -1.42751900 |
| O | -8.33244500 | 1.44397900  | -2.41919800 |
| O | -8.91937200 | 0.07103200  | -0.84945300 |
| H | -2.31134200 | -1.37360400 | 2.11783700  |
| H | -1.18321200 | -0.51582700 | 3.19337800  |
| H | -1.60172300 | 1.60132400  | 2.05650300  |
| H | -3.16628800 | 0.90317800  | 2.48972800  |
| H | -0.04458200 | -0.87729100 | -0.79943700 |
| H | -1.60285300 | -1.58992500 | -0.34569800 |
| H | -1.97225400 | 0.52266500  | -1.49854400 |
| H | -0.84326300 | 1.37640800  | -0.42012200 |
| H | -6.08911200 | 2.18788400  | -2.31026800 |
| H | 3.01758300  | 0.21439200  | 1.17573500  |
| N | -3.63521100 | 2.58581100  | -1.62144300 |
| H | -3.80697100 | 2.80259200  | -2.59426300 |
| H | -2.65566300 | 2.59424500  | -1.38134100 |
| N | 6.88714700  | 2.80367400  | 0.65040900  |
| C | 5.90414900  | 3.32756000  | 1.57950400  |
| C | 8.13872100  | 3.51577500  | 0.45569600  |
| H | 4.94321900  | 3.51570600  | 1.08451500  |
| H | 5.72931200  | 2.63897500  | 2.41645800  |
| H | 6.26358300  | 4.27153700  | 1.98681600  |
| H | 8.12559100  | 4.42334500  | 1.05770100  |
| H | 9.00294800  | 2.91631200  | 0.76731600  |
| H | 8.28056200  | 3.80906500  | -0.59117700 |

**BCD3**

|   |             |             |             |
|---|-------------|-------------|-------------|
| C | -4.55904800 | -0.58524600 | -1.39971700 |
| C | -5.75693300 | -0.02522000 | -0.93451100 |
| C | -3.53238600 | -0.91027100 | -0.52599300 |
| C | -5.93278300 | 0.21885400  | 0.46418200  |
| C | -4.87697700 | -0.11772500 | 1.35140100  |
| C | -3.72525000 | -0.66132300 | 0.85691700  |
| H | -4.97906900 | 0.05304900  | 2.41828900  |
| C | -2.28398100 | -1.48157900 | -0.93341800 |
| O | -2.72875600 | -0.97782900 | 1.75266400  |
| O | -0.73309400 | -1.76191500 | 2.26927200  |
| C | -1.30691800 | -1.74845300 | -0.03702900 |
| O | -0.10045100 | -3.56970000 | -0.93993700 |
| C | -1.53059900 | -1.51181500 | 1.38464600  |
| N | 1.12882700  | -1.76691900 | -0.30880700 |
| N | 3.33267100  | -0.19597900 | -1.17393800 |
| C | 2.40181900  | -2.42227900 | -0.59890500 |
| C | 3.20677500  | -1.58880500 | -1.59273700 |
| C | 1.26588900  | -0.39389900 | 0.15966200  |

|   |              |             |             |
|---|--------------|-------------|-------------|
| C | 2.05308700   | 0.43531400  | -0.85757600 |
| C | -0.03628900  | -2.43129600 | -0.46124500 |
| C | 4.52533600   | 0.36294800  | -0.75339300 |
| C | 5.49280700   | -0.36346100 | 0.02514600  |
| C | 6.71016900   | 0.21728300  | 0.51569900  |
| C | 6.97465700   | 1.58480800  | 0.20842400  |
| C | 6.07248800   | 2.25611200  | -0.56620700 |
| C | 4.87329400   | 1.67428500  | -1.07363700 |
| N | 5.43982900   | -1.60615000 | 0.44735700  |
| N | 7.35926500   | -0.68720600 | 1.20908000  |
| O | 6.57577700   | -1.79536900 | 1.15921200  |
| N | 8.16032400   | 2.25147400  | 0.66672800  |
| O | 8.32134400   | 3.43651600  | 0.37812300  |
| O | 8.96240600   | 1.59905000  | 1.33011700  |
| H | 2.96091400   | -2.53280900 | 0.33641000  |
| H | 2.19619200   | -3.40963200 | -1.00925500 |
| H | 2.69714700   | -1.60042700 | -2.56521500 |
| H | 4.19655600   | -2.02295600 | -1.73124000 |
| H | 0.28385100   | 0.05661600  | 0.29488200  |
| H | 1.78347300   | -0.39435100 | 1.12595500  |
| H | 6.29891700   | 3.28037900  | -0.84139100 |
| H | -2.12658600  | -1.69500400 | -1.98743400 |
| C | -8.17622400  | 1.11345000  | 0.06153800  |
| C | -7.13862200  | 0.78240700  | 0.93257700  |
| C | -6.82607700  | 0.31936400  | -1.80954900 |
| C | -7.98410700  | 0.86387800  | -1.34198700 |
| H | -7.23591600  | 0.95256500  | 1.99748800  |
| H | -6.70783800  | 0.14078400  | -2.87482000 |
| H | -8.76921200  | 1.10985200  | -2.04525500 |
| H | -4.43062300  | -0.76776700 | -2.46348300 |
| N | -9.34852200  | 1.65887700  | 0.50554800  |
| C | -10.41034400 | 2.00824300  | -0.42388500 |
| C | -9.52973600  | 1.90818300  | 1.92303200  |
| H | -11.24456100 | 2.42727000  | 0.13702300  |
| H | -10.08370700 | 2.75938200  | -1.15289700 |
| H | -10.51759700 | 2.33556700  | 2.08905800  |
| H | -8.78218200  | 2.61416200  | 2.30680100  |
| H | -10.77869900 | 1.13175900  | -0.96989400 |
| H | -9.45590200  | 0.98161600  | 2.50604600  |
| N | 4.13345500   | 2.43580200  | -1.96032500 |
| H | 2.22112000   | 1.42757600  | -0.43676300 |
| H | 1.45485100   | 0.53749500  | -1.77307600 |
| H | 3.24031900   | 2.07786800  | -2.26275200 |
| H | 4.13952700   | 3.43914400  | -1.83419500 |

**BCD4**

|   |             |             |             |
|---|-------------|-------------|-------------|
| C | 7.65798200  | 1.41675800  | -0.22299800 |
| C | 4.60664300  | -1.86499500 | 1.71511700  |
| C | 5.80981500  | -1.22913500 | 1.71078400  |
| C | 5.44653800  | 1.09721200  | -1.20554500 |
| C | 6.65804500  | 1.73059600  | -1.19964100 |
| H | 8.07583700  | 0.16076700  | 1.48517800  |
| C | 3.61072500  | -1.54745500 | 0.74321100  |
| C | 6.11316900  | -0.22471800 | 0.73429500  |
| H | 4.71048900  | 1.35712300  | -1.95843000 |
| H | 6.85573500  | 2.48232800  | -1.95276700 |
| C | 5.13497800  | 0.10506700  | -0.24436600 |
| C | 3.89809900  | -0.57881600 | -0.20514200 |
| C | 2.32898000  | -2.16805500 | 0.68615400  |
| O | 2.98099900  | -0.24913600 | -1.15580400 |
| O | 1.02198200  | -0.44906500 | -2.15980900 |
| C | 1.40369700  | -1.80907400 | -0.24149900 |
| O | 0.11238000  | -3.76697200 | -0.52200400 |
| C | 1.73547100  | -0.81758600 | -1.24435700 |
| N | -1.04896800 | -1.84061000 | -0.20808900 |
| N | -3.37023900 | -0.82292300 | 1.09287300  |
| C | -2.34003000 | -2.48586100 | -0.43367700 |
| C | -3.27079200 | -2.24041800 | 0.75150600  |
| C | -1.14075800 | -0.42260100 | 0.11868200  |
| C | -2.05764600 | -0.21435800 | 1.32441900  |
| C | 0.09687300  | -2.54397700 | -0.33694300 |
| C | -4.46928800 | -0.04758600 | 0.79973300  |
| C | -5.34450100 | -0.30819500 | -0.31595000 |
| C | -6.46975700 | 0.52020000  | -0.64756700 |
| C | -6.73959900 | 1.65415500  | 0.17133500  |
| C | -5.92702600 | 1.87048600  | 1.25263500  |
| C | -4.83036900 | 1.04050000  | 1.59938800  |
| N | -5.27203800 | -1.26602900 | -1.21199900 |
| N | -7.04637700 | 0.03498300  | -1.72196100 |
| O | -6.30578000 | -1.05492000 | -2.05468700 |
| N | -7.83004100 | 2.54095100  | -0.09336300 |
| O | -7.99973400 | 3.51038500  | 0.64753000  |
| O | -8.55274200 | 2.29113400  | -1.05667800 |
| H | -2.78306100 | -2.07773400 | -1.34854800 |
| H | -2.17327100 | -3.55342000 | -0.56810400 |
| H | -2.87389100 | -2.75748000 | 1.63380500  |
| H | -4.25990600 | -2.64550800 | 0.54423400  |
| H | -0.15413200 | -0.03080600 | 0.36136300  |
| H | -1.52619300 | 0.12500500  | -0.74923100 |



|   |             |             |             |
|---|-------------|-------------|-------------|
| H | -2.16718400 | 0.85257600  | 1.51220700  |
| H | -1.60346100 | -0.67726300 | 2.20913500  |
| H | -6.15680200 | 2.71162200  | 1.89751200  |
| H | 2.08921500  | -2.94329300 | 1.40927700  |
| H | 4.38333200  | -2.62477200 | 2.45812300  |
| H | 6.56265700  | -1.47589900 | 2.45337200  |
| C | 7.35392400  | 0.43606900  | 0.72641700  |
| C | 9.86936700  | 1.72159500  | 0.75320800  |
| C | 9.15770700  | 3.06827800  | -1.24108700 |
| H | 10.75484400 | 2.33381000  | 0.58820200  |
| H | 9.51163400  | 1.90722100  | 1.77362600  |
| H | 10.16434300 | 0.66707000  | 0.68013700  |
| H | 10.15845600 | 3.46016300  | -1.06482300 |
| H | 9.13219900  | 2.64989200  | -2.25465400 |
| H | 8.45473000  | 3.90833200  | -1.19515600 |
| N | -4.10269700 | 1.35707500  | 2.74550900  |
| H | -3.71121100 | 0.55034800  | 3.22163500  |
| H | -4.59687900 | 1.95148100  | 3.40054200  |
| N | 8.86210200  | 2.06348600  | -0.23349800 |

**BCD-H<sub>2</sub>S**

|   |             |             |             |
|---|-------------|-------------|-------------|
| C | -4.06892200 | -2.66781900 | 0.20370100  |
| C | -2.89480600 | -1.96314600 | 0.33184900  |
| C | -2.84951700 | -0.57479900 | 0.06020000  |
| C | -4.04613900 | 0.07351300  | -0.34883000 |
| C | -5.24044200 | -0.67736500 | -0.47295100 |
| C | -5.25569800 | -2.02315500 | -0.20266400 |
| H | -4.08110600 | -3.73207700 | 0.41767200  |
| H | -2.00053200 | -2.48909900 | 0.64587500  |
| C | -1.64728600 | 0.21065400  | 0.17939700  |
| C | -4.03096900 | 1.47121500  | -0.62931900 |
| H | -6.14635000 | -0.16656800 | -0.78692500 |
| H | -6.17495400 | -2.59194300 | -0.30001600 |
| C | -2.88962600 | 2.20997800  | -0.51400400 |
| C | -1.70517900 | 1.56262500  | -0.10760700 |
| H | -4.95525100 | 1.94873100  | -0.94069000 |
| H | -2.86600700 | 3.27345900  | -0.72348400 |
| C | -0.37279200 | -0.30936400 | 0.57850600  |
| O | -0.60174900 | 2.35659400  | -0.00712800 |
| O | 1.53500000  | 2.70713200  | 0.44000100  |
| C | 0.72833000  | 0.47601700  | 0.64504700  |
| O | 2.07793300  | -0.48913800 | 2.32356300  |
| C | 0.63092700  | 1.89672700  | 0.36550300  |
| C | 2.03263100  | -0.07226600 | 1.15917800  |
| N | 3.09031300  | -0.09392000 | 0.32567800  |

|   |             |             |             |
|---|-------------|-------------|-------------|
| N | 5.05757900  | -1.02185500 | -1.47142000 |
| C | 4.40527400  | -0.50844000 | 0.81584400  |
| C | 5.01188700  | -1.55193100 | -0.11156700 |
| C | 3.07325800  | 0.33779400  | -1.07135700 |
| C | 3.71306300  | -0.72638000 | -1.95532300 |
| H | 5.51174600  | -1.68697800 | -2.09078700 |
| H | 4.28587600  | -0.90111200 | 1.82393200  |
| H | 5.05527800  | 0.37494500  | 0.85329900  |
| H | 4.41508600  | -2.47819300 | -0.04848700 |
| H | 6.02838600  | -1.78003900 | 0.22071600  |
| H | 3.77309400  | -0.34812200 | -2.97952700 |
| H | 3.06751700  | -1.62167100 | -1.95811200 |
| H | 3.62648500  | 1.28008100  | -1.15896200 |
| H | 2.04653200  | 0.50803500  | -1.39188000 |
| H | -0.27447600 | -1.35886700 | 0.83245900  |

**BCD1-H<sub>2</sub>S**

|   |             |             |             |
|---|-------------|-------------|-------------|
| C | -4.06036700 | 1.64605600  | 0.08641300  |
| C | -2.78898400 | 1.15136100  | -0.11163100 |
| C | -2.53176200 | -0.23346700 | 0.03879100  |
| C | -3.59617400 | -1.10131800 | 0.39744200  |
| C | -4.89174500 | -0.55493000 | 0.59418800  |
| C | -5.12501700 | 0.78210100  | 0.44392300  |
| H | -1.98637900 | 1.82247700  | -0.38235400 |
| C | -1.22439600 | -0.80452100 | -0.15833900 |
| C | -3.35691900 | -2.49300500 | 0.55393900  |
| H | -5.70431000 | -1.22158100 | 0.86824900  |
| H | -6.11207900 | 1.20741200  | 0.59181600  |
| C | -2.11455700 | -3.03179600 | 0.36570400  |
| C | -1.06112900 | -2.17080200 | 0.00928300  |
| H | -4.18797700 | -3.13552400 | 0.82955600  |
| H | -1.91922100 | -4.09178800 | 0.48088900  |
| C | -0.05749000 | -0.05695100 | -0.52072500 |
| O | 0.15363100  | -2.76397400 | -0.17069100 |
| O | 2.30779900  | -2.72908300 | -0.66533200 |
| C | 1.15363200  | -0.64624800 | -0.66497100 |
| O | 2.29423700  | 0.66987400  | -2.25879500 |
| C | 1.28870400  | -2.08247500 | -0.51135200 |
| C | 2.34197800  | 0.14741600  | -1.13775800 |
| N | 3.40231500  | 0.26330400  | -0.31492500 |
| N | 5.23915400  | 1.33069700  | 1.54225500  |
| C | 4.62380500  | 0.92355400  | -0.77656500 |
| C | 5.07945300  | 1.96436700  | 0.23642900  |
| C | 3.48549400  | -0.28661800 | 1.03744800  |
| C | 3.96928100  | 0.78382400  | 2.00869000  |

|   |             |             |             |
|---|-------------|-------------|-------------|
| H | 5.59706200  | 2.00230800  | 2.21536800  |
| H | 4.42096800  | 1.37990400  | -1.74362000 |
| H | 5.40412600  | 0.16185500  | -0.89995300 |
| H | 4.34281500  | 2.78584100  | 0.26272700  |
| H | 6.03937400  | 2.37969700  | -0.08257100 |
| H | 4.11125200  | 0.33127400  | 2.99395600  |
| H | 3.19096800  | 1.56143800  | 2.09779600  |
| H | 4.18222600  | -1.13289400 | 1.03517100  |
| H | 2.50602600  | -0.64543600 | 1.34982800  |
| H | -0.13095700 | 1.01269400  | -0.68333100 |
| O | -4.40367400 | 2.95115000  | -0.03577200 |
| C | -3.39819900 | 3.89137600  | -0.39500900 |
| H | -2.97324800 | 3.65382500  | -1.37561600 |
| H | -3.89713400 | 4.85861100  | -0.43730000 |
| H | -2.60338500 | 3.92058300  | 0.35738200  |

### BCD2-H<sub>2</sub>S

|   |             |             |             |
|---|-------------|-------------|-------------|
| C | 3.96712800  | -1.12010200 | 0.04493100  |
| C | 2.63978600  | -0.71903500 | -0.13644700 |
| C | 2.24286300  | 0.62200900  | 0.02042500  |
| C | 3.20992500  | 1.60112200  | 0.37961700  |
| C | 4.54985000  | 1.18156800  | 0.56734700  |
| C | 4.92518900  | -0.12300800 | 0.41041900  |
| H | 1.89993000  | -1.45903400 | -0.40451200 |
| C | 0.87931300  | 1.06119500  | -0.16599300 |
| C | 2.82963900  | 2.95709600  | 0.54471900  |
| H | 5.29400100  | 1.92320000  | 0.84492300  |
| H | 5.96107500  | -0.39475900 | 0.56665100  |
| C | 1.53611300  | 3.36886600  | 0.36614800  |
| C | 0.57742700  | 2.40373400  | 0.01073200  |
| H | 3.59250200  | 3.68021800  | 0.81949400  |
| H | 1.23335600  | 4.40247000  | 0.48797700  |
| C | -0.20546900 | 0.20322600  | -0.52631000 |
| O | -0.69441100 | 2.86751300  | -0.16075400 |
| O | -2.83628400 | 2.61718200  | -0.64641800 |
| C | -1.47495700 | 0.66268200  | -0.66003400 |
| O | -2.45714400 | -0.79440000 | -2.23723500 |
| C | -1.75595100 | 2.07464800  | -0.49949300 |
| C | -2.57094200 | -0.25468900 | -1.12860600 |
| N | -3.62623000 | -0.46132700 | -0.31614300 |
| N | -5.34445100 | -1.71073300 | 1.54183300  |
| C | -4.76801500 | -1.25152500 | -0.77708100 |
| C | -5.11167800 | -2.33052900 | 0.24021400  |
| C | -3.77602500 | 0.08595300  | 1.03119300  |
| C | -4.14425700 | -1.02438000 | 2.00854000  |

|   |             |             |             |
|---|-------------|-------------|-------------|
| H | -5.62815700 | -2.41393900 | 2.21806000  |
| H | -4.51488200 | -1.68783700 | -1.74152900 |
| H | -5.62564400 | -0.57888100 | -0.90497900 |
| H | -4.28994000 | -3.06661400 | 0.27360200  |
| H | -6.01945900 | -2.84987700 | -0.07912500 |
| H | -4.33934200 | -0.58359000 | 2.99008900  |
| H | -3.28566600 | -1.71123900 | 2.10612000  |
| H | -4.56130100 | 0.85065300  | 1.01917200  |
| H | -2.84367200 | 0.55238900  | 1.34493500  |
| H | -0.02250300 | -0.85196500 | -0.69685900 |
| N | 4.35361000  | -2.42348000 | -0.12023100 |
| C | 3.36216100  | -3.43388500 | -0.43680800 |
| C | 5.72195100  | -2.82899000 | 0.15340000  |
| H | 2.85199800  | -3.21052500 | -1.38144800 |
| H | 3.85574100  | -4.39904700 | -0.54242900 |
| H | 2.60194500  | -3.52174600 | 0.35108500  |
| H | 5.81795000  | -3.89702800 | -0.03745400 |
| H | 6.43497700  | -2.30821200 | -0.49571000 |
| H | 6.00500500  | -2.64396600 | 1.19751000  |

**BCD3-H<sub>2</sub>S**

|   |             |             |             |
|---|-------------|-------------|-------------|
| C | 1.26353800  | -1.41145400 | -0.54467500 |
| C | 2.59064300  | -1.03944900 | -0.28711300 |
| C | 0.24388400  | -0.47195500 | -0.55187800 |
| C | 2.90758000  | 0.33054800  | -0.02504000 |
| C | 1.85779900  | 1.28572600  | -0.03564300 |
| C | 0.57803300  | 0.88158500  | -0.29186900 |
| H | 2.06525900  | 2.33353800  | 0.15643800  |
| C | -1.13169700 | -0.78319400 | -0.80408900 |
| O | -0.40843900 | 1.84173700  | -0.30015000 |
| O | -2.49881300 | 2.50250200  | -0.53865300 |
| C | -2.08688300 | 0.17318500  | -0.76957300 |
| O | -3.76706400 | -0.55130100 | -2.26437700 |
| C | -1.72225100 | 1.56560100  | -0.53375500 |
| N | -4.45802900 | 0.01185500  | -0.17304700 |
| N | -6.33842400 | -0.55369700 | 1.85387100  |
| C | -5.87194600 | -0.16746000 | -0.50299900 |
| C | -6.54103500 | -1.08633800 | 0.50938300  |
| C | -4.20704700 | 0.43651600  | 1.20317400  |
| C | -4.91645200 | -0.49726800 | 2.17681000  |
| C | -3.51403300 | -0.14563200 | -1.12229100 |
| H | -6.35943400 | 0.81579600  | -0.48740600 |
| H | -5.93867700 | -0.57760100 | -1.50893400 |
| H | -6.12550300 | -2.10303000 | 0.40061000  |
| H | -7.61289900 | -1.13368400 | 0.29822400  |

|   |             |             |             |
|---|-------------|-------------|-------------|
| H | -3.13646500 | 0.42446200  | 1.40169900  |
| H | -4.57411800 | 1.46143900  | 1.33243900  |
| H | -4.79202600 | -0.11250200 | 3.19280600  |
| H | -4.44047200 | -1.49192100 | 2.12646900  |
| H | -1.40253100 | -1.81345500 | -1.01972900 |
| C | 5.27546700  | -0.23179000 | 0.24429500  |
| C | 4.24347400  | 0.70558300  | 0.23291100  |
| C | 3.65730700  | -1.98244100 | -0.27699600 |
| C | 4.94206800  | -1.60465200 | -0.02545800 |
| H | 4.44541400  | 1.75223900  | 0.42301600  |
| H | 3.43348000  | -3.02674400 | -0.47709400 |
| H | 5.72003500  | -2.35712400 | -0.03092600 |
| H | 1.02831700  | -2.45415500 | -0.74208300 |
| N | 6.57176100  | 0.12050400  | 0.50391200  |
| C | 7.64266300  | -0.85900100 | 0.41768500  |
| C | 6.90197300  | 1.51665700  | 0.71895000  |
| H | 8.58577000  | -0.37113600 | 0.66029900  |
| H | 7.49841700  | -1.67869200 | 1.13007500  |
| H | 7.96723400  | 1.60572200  | 0.92741700  |
| H | 6.35339400  | 1.92693400  | 1.57489800  |
| H | -6.82745100 | -1.12799600 | 2.53456400  |
| H | 7.73066300  | -1.28532200 | -0.58960000 |
| H | 6.67045700  | 2.13049500  | -0.16187300 |

**BCD4-H<sub>2</sub>S**

|   |             |             |             |
|---|-------------|-------------|-------------|
| C | -0.99897200 | 2.49565500  | 0.23840000  |
| C | -2.34007500 | 2.34198700  | 0.41244200  |
| C | -0.18404600 | 1.39302500  | -0.15761000 |
| C | -2.97310300 | 1.07316300  | 0.20450600  |
| C | -2.17896400 | -0.03808300 | -0.19242700 |
| C | -0.78966500 | 0.16412000  | -0.36261100 |
| C | 1.22592400  | 1.47645400  | -0.35486100 |
| O | -0.05241600 | -0.91398500 | -0.74784100 |
| O | 1.83852400  | -1.90898900 | -1.31430200 |
| C | 1.96159800  | 0.38996600  | -0.70372800 |
| O | 3.78970100  | 1.27407700  | -1.90933900 |
| C | 1.30466100  | -0.87839000 | -0.94544900 |
| C | 3.43095100  | 0.52049200  | -0.99443000 |
| N | 4.29991600  | -0.17918800 | -0.23753900 |
| N | 6.21611300  | -0.78047600 | 1.74580700  |
| C | 5.72693400  | -0.17585000 | -0.55990100 |
| C | 6.54981700  | 0.15673900  | 0.67681700  |
| C | 3.94044000  | -1.02232200 | 0.90136500  |
| C | 4.80620100  | -0.67147800 | 2.10597700  |
| H | 6.79768300  | -0.60341200 | 2.55987100  |

|   |             |             |             |
|---|-------------|-------------|-------------|
| H | 5.89683900  | 0.55177500  | -1.35128200 |
| H | 6.00141100  | -1.17254200 | -0.92834200 |
| H | 6.35279500  | 1.20304700  | 0.96774400  |
| H | 7.61277400  | 0.06585300  | 0.43674900  |
| H | 4.58622900  | -1.37063100 | 2.91753400  |
| H | 4.54363000  | 0.34448300  | 2.44853800  |
| H | 4.08813700  | -2.07330600 | 0.62696800  |
| H | 2.89129600  | -0.87424500 | 1.15202700  |
| H | 1.71832900  | 2.43528200  | -0.21471200 |
| C | -4.35790400 | 0.90869400  | 0.38427300  |
| C | -2.81552100 | -1.28635900 | -0.39675800 |
| C | -4.16334800 | -1.42969000 | -0.21768000 |
| C | -4.98337300 | -0.32540100 | 0.18246600  |
| H | -4.93291200 | 1.77534800  | 0.68589500  |
| H | -2.22214200 | -2.14192200 | -0.70024300 |
| H | -4.60995100 | -2.40139100 | -0.38420500 |
| H | -0.52575300 | 3.45989900  | 0.39825300  |
| H | -2.95353600 | 3.18567900  | 0.71410900  |
| N | -6.32930200 | -0.49069100 | 0.35658100  |
| C | -6.95604800 | -1.78092200 | 0.12322300  |
| C | -7.14559200 | 0.63997900  | 0.75671100  |
| H | -7.10277700 | 1.45037200  | 0.01785900  |
| H | -8.18230300 | 0.31907100  | 0.84859400  |
| H | -6.82631500 | 1.04317900  | 1.72587300  |
| H | -6.55709300 | -2.55378000 | 0.79094100  |
| H | -8.02469800 | -1.69322500 | 0.31400100  |
| H | -6.82470100 | -2.11654200 | -0.91260600 |

Cartesian coordinates of the optimized excited state structures obtained with the PCM//CAM-B3LYP/6-31+G (d) in water solvent.

### BCD

|   |             |             |             |
|---|-------------|-------------|-------------|
| C | -6.87171300 | 1.18663700  | -2.67039100 |
| C | -5.81227600 | 0.61743800  | -2.00285900 |
| C | -5.79277000 | 0.56284700  | -0.58915300 |
| C | -6.89161700 | 1.11188300  | 0.12475800  |
| C | -7.96841300 | 1.69231900  | -0.58847600 |
| C | -7.96239300 | 1.73041600  | -1.96081000 |
| H | -6.86700000 | 1.21716000  | -3.75554300 |
| H | -4.98909200 | 0.20909600  | -2.57781400 |
| C | -4.71068900 | -0.02455800 | 0.16005200  |
| C | -6.89761300 | 1.07188500  | 1.54993900  |
| H | -8.80118200 | 2.10733200  | -0.02783400 |
| H | -8.79155100 | 2.17635400  | -2.50079800 |
| C | -5.87037700 | 0.51425400  | 2.25426800  |

|             |             |             |             |
|-------------|-------------|-------------|-------------|
| C           | -4.78337800 | -0.03126100 | 1.54212500  |
| H           | -7.74579300 | 1.49792800  | 2.07747900  |
| H           | -5.86549000 | 0.47726900  | 3.33772000  |
| C           | -3.54718700 | -0.61678600 | -0.42488000 |
| O           | -3.79384400 | -0.57980600 | 2.30078800  |
| O           | -1.86482300 | -1.62706800 | 2.56228400  |
| C           | -2.54654800 | -1.12874900 | 0.33366100  |
| O           | -1.62415000 | -2.75187200 | -1.11096900 |
| C           | -2.66376800 | -1.14820000 | 1.78054900  |
| N           | -0.13386400 | -1.41604300 | -0.03972000 |
| N           | 2.28734400  | -0.03583400 | -0.56636400 |
| C           | 1.01170900  | -2.14189600 | -0.56605900 |
| C           | 1.91551900  | -1.20161000 | -1.36396000 |
| C           | 0.21547200  | -0.24100300 | 0.73793900  |
| C           | 1.12687800  | 0.69609100  | -0.07126300 |
| C           | -1.39298400 | -1.82774000 | -0.32761900 |
| C           | 3.56391400  | 0.36489700  | -0.35189100 |
| C           | 4.69125800  | -0.52081900 | -0.43860900 |
| C           | 6.03144700  | -0.05915200 | -0.20160400 |
| C           | 6.25684800  | 1.32049700  | 0.11278000  |
| C           | 5.15342600  | 2.19116700  | 0.18664800  |
| C           | 3.86929700  | 1.73037500  | -0.03877900 |
| N           | 4.72741800  | -1.81480800 | -0.66991400 |
| N           | 6.85940400  | -1.06811400 | -0.29657100 |
| O           | 6.06346500  | -2.15865400 | -0.59316300 |
| N           | 7.55673900  | 1.81624700  | 0.35263700  |
| O           | 7.68218700  | 3.02501000  | 0.63156700  |
| O           | 8.51699000  | 1.03157100  | 0.27847300  |
| H           | 1.57531500  | -2.57895900 | 0.26587800  |
| H           | 0.65395800  | -2.94154600 | -1.21201600 |
| H           | 1.36878000  | -0.83223600 | -2.24229700 |
| H           | 2.80334900  | -1.72888900 | -1.69883300 |
| H           | -0.67852500 | 0.31886100  | 1.00588600  |
| H           | 0.72383500  | -0.54540400 | 1.65855300  |
| H           | 1.43501400  | 1.50973700  | 0.58041800  |
| H           | 0.57240700  | 1.10790500  | -0.92326900 |
| H           | 5.32509700  | 3.23494900  | 0.40819900  |
| H           | 3.06758800  | 2.45585500  | -0.02257500 |
| H           | -3.44882800 | -0.66257200 | -1.50366400 |
| <b>BCD1</b> |             |             |             |
| C           | 6.87090700  | 1.37749800  | 1.71747300  |
| C           | 5.76930400  | 0.70101000  | 1.23746800  |
| C           | 5.64788500  | 0.43054300  | -0.14695800 |
| C           | 6.66981600  | 0.86466000  | -1.03094400 |

|   |             |             |             |
|---|-------------|-------------|-------------|
| C | 7.78842900  | 1.55926500  | -0.50027900 |
| C | 7.89283900  | 1.81217000  | 0.83752100  |
| H | 4.99718200  | 0.37644300  | 1.92047600  |
| C | 4.52071800  | -0.27271000 | -0.70456900 |
| C | 6.56430800  | 0.60251100  | -2.42313300 |
| H | 8.56866500  | 1.89027400  | -1.17947000 |
| H | 8.74434200  | 2.34187900  | 1.25143500  |
| C | 5.49345100  | -0.06580200 | -2.94934100 |
| C | 4.48154100  | -0.49576800 | -2.07335000 |
| H | 7.36038500  | 0.94546900  | -3.07744200 |
| H | 5.40332900  | -0.27229800 | -4.00955200 |
| C | 3.41882400  | -0.77093000 | 0.05676300  |
| O | 3.44153900  | -1.16162200 | -2.64937800 |
| O | 1.51472900  | -2.24140500 | -2.58701400 |
| C | 2.36503000  | -1.39692500 | -0.52616000 |
| O | 1.59484400  | -2.73066700 | 1.26297400  |
| C | 2.36541300  | -1.64343200 | -1.95620900 |
| N | -0.00833400 | -1.65444500 | 0.07041600  |
| N | -2.36004500 | -0.17529700 | 0.62483300  |
| C | -1.08490100 | -2.26839600 | 0.82964200  |
| C | -1.89338900 | -1.19237100 | 1.56250700  |
| C | -0.44405400 | -0.61741600 | -0.84447600 |
| C | -1.26285200 | 0.45482400  | -0.09984700 |
| C | 1.28391900  | -1.97836400 | 0.33749500  |
| C | -3.65978800 | 0.14046600  | 0.42369700  |
| C | -4.75136400 | -0.74397300 | 0.75799200  |
| C | -6.11665800 | -0.37769100 | 0.50546000  |
| C | -6.43807000 | 0.89329400  | -0.06960000 |
| C | -5.36622600 | 1.77446500  | -0.38340000 |
| C | -4.04071000 | 1.39059100  | -0.12552100 |
| N | -4.72442900 | -1.95463600 | 1.24889000  |
| N | -6.89245500 | -1.37442900 | 0.85572400  |
| O | -6.03733800 | -2.34699700 | 1.32191600  |
| N | -7.77778800 | 1.24383800  | -0.31954600 |
| O | -8.00205800 | 2.35649100  | -0.83246400 |
| O | -8.67008400 | 0.43571800  | -0.02233700 |
| H | -1.74093600 | -2.82178200 | 0.14897600  |
| H | -0.65654500 | -2.95880100 | 1.55386700  |
| H | -1.24409400 | -0.68685700 | 2.28884600  |
| H | -2.73022600 | -1.63926000 | 2.08929100  |
| H | 0.41115800  | -0.12065200 | -1.29762600 |
| H | -1.05395200 | -1.05595000 | -1.64055400 |
| H | -1.63688800 | 1.16264300  | -0.83504700 |
| H | -0.62065100 | 0.98220500  | 0.61437400  |



|   |             |             |             |
|---|-------------|-------------|-------------|
| H | -3.27620900 | 2.12806300  | -0.32609900 |
| H | 3.40738200  | -0.65083400 | 1.13424700  |
| C | -5.52902000 | 3.07805700  | -0.93855500 |
| N | -5.48860700 | 4.15036600  | -1.37956500 |
| O | 7.07630700  | 1.68088900  | 3.02132900  |
| C | 6.10194400  | 1.28178200  | 3.97843100  |
| H | 5.13429500  | 1.74921100  | 3.76923000  |
| H | 5.99328700  | 0.19252000  | 3.99460900  |
| H | 6.47378600  | 1.62655200  | 4.94231800  |

## BCD2

|   |             |             |             |
|---|-------------|-------------|-------------|
| C | 6.70551700  | 1.57369800  | -0.14362800 |
| C | 5.50791900  | 0.89780500  | 0.11126500  |
| C | 5.24446800  | -0.37291000 | -0.43171100 |
| C | 6.21736100  | -0.99562400 | -1.26163100 |
| C | 7.42934300  | -0.30441700 | -1.50709200 |
| C | 7.67573600  | 0.92925600  | -0.97364300 |
| H | 4.76538900  | 1.36468800  | 0.74161500  |
| C | 4.01505800  | -1.09057100 | -0.18347300 |
| C | 5.96956200  | -2.27512000 | -1.81951800 |
| H | 8.17993000  | -0.77508700 | -2.13630200 |
| H | 8.61826800  | 1.41613900  | -1.18752600 |
| C | 4.80194700  | -2.95086300 | -1.58368100 |
| C | 3.83894300  | -2.34008000 | -0.76230300 |
| H | 6.73288100  | -2.72344400 | -2.44932300 |
| H | 4.60216800  | -3.92974400 | -2.00391800 |
| C | 2.94693900  | -0.60775400 | 0.63096600  |
| O | 2.69821500  | -3.05777200 | -0.55271300 |
| O | 0.70001900  | -3.37232900 | 0.33731100  |
| C | 1.79707300  | -1.30925100 | 0.80626600  |
| O | 1.06301500  | -0.54311000 | 2.91641900  |
| C | 1.65122000  | -2.62260000 | 0.21200500  |
| N | -0.51584200 | -0.63847800 | 1.28847000  |
| N | -2.72223600 | 0.86754100  | 0.32504900  |
| C | -1.59366000 | -0.27927000 | 2.20181700  |
| C | -2.29541100 | 0.98807700  | 1.71895300  |
| C | -0.93249200 | -0.76606100 | -0.09814200 |
| C | -1.61892300 | 0.52039800  | -0.57637700 |
| C | 0.74649500  | -0.80058400 | 1.75075800  |
| C | -4.02909300 | 0.83624800  | -0.05459300 |
| C | -5.06162800 | 0.26292000  | 0.75961500  |
| C | -6.41398800 | 0.10693600  | 0.29563500  |
| C | -6.75935600 | 0.57766200  | -1.01804900 |
| C | -5.79137600 | 1.20827400  | -1.78801900 |
| C | -4.47634600 | 1.40762000  | -1.30007200 |

|   |             |             |             |
|---|-------------|-------------|-------------|
| N | -4.96002700 | -0.27163500 | 1.95403400  |
| N | -7.10938200 | -0.51632400 | 1.21118700  |
| O | -6.21690000 | -0.74184500 | 2.24902900  |
| N | -8.06003300 | 0.42252800  | -1.52352900 |
| O | -8.30778200 | 0.83933900  | -2.67622600 |
| O | -8.92117900 | -0.12705200 | -0.80780800 |
| H | -2.31318400 | -1.10380800 | 2.24958500  |
| H | -1.17205800 | -0.11672500 | 3.19223600  |
| H | -1.59582300 | 1.83247100  | 1.76653300  |
| H | -3.15194200 | 1.21211900  | 2.35011600  |
| H | -0.07007300 | -0.94340300 | -0.73846600 |
| H | -1.61944400 | -1.61314000 | -0.19910000 |
| H | -1.99631000 | 0.36345100  | -1.58559700 |
| H | -0.88984700 | 1.33911300  | -0.58980900 |
| H | -6.06511500 | 1.60404100  | -2.75666100 |
| H | 3.04098200  | 0.35002400  | 1.13090000  |
| N | -3.63477400 | 2.18220300  | -2.01290900 |
| H | -3.96431500 | 2.65497800  | -2.84443400 |
| H | -2.78285500 | 2.54462900  | -1.60681100 |
| N | 6.95499000  | 2.81585200  | 0.37605700  |
| C | 5.99370500  | 3.42582100  | 1.27530400  |
| C | 8.24796600  | 3.45086500  | 0.18271700  |
| H | 5.02070200  | 3.55792000  | 0.78775300  |
| H | 5.84419100  | 2.82609000  | 2.18344600  |
| H | 6.35564800  | 4.40933100  | 1.57204800  |
| H | 8.23781200  | 4.42557600  | 0.66871600  |
| H | 9.06587200  | 2.86202400  | 0.61772200  |
| H | 8.46325900  | 3.61025900  | -0.87954700 |

### BCD3

|   |             |             |             |
|---|-------------|-------------|-------------|
| C | -4.62985400 | -0.74559500 | -1.33250500 |
| C | -5.83160800 | -0.15729600 | -0.91662300 |
| C | -3.57870800 | -0.93222300 | -0.44668500 |
| C | -5.98614100 | 0.26225200  | 0.44279400  |
| C | -4.90542700 | 0.06670600  | 1.34259100  |
| C | -3.75098200 | -0.51187200 | 0.89713200  |
| H | -4.99179600 | 0.37112700  | 2.38068800  |
| C | -2.32798300 | -1.52740700 | -0.80360200 |
| O | -2.73070500 | -0.69116100 | 1.80336300  |
| O | -0.71467400 | -1.37430800 | 2.37824300  |
| C | -1.32602300 | -1.65759000 | 0.09763900  |
| O | -0.13031700 | -3.53133800 | -0.70280200 |
| C | -1.52900200 | -1.24821000 | 1.48288300  |
| N | 1.11760500  | -1.72113500 | -0.14079800 |
| N | 3.36979100  | -0.26330800 | -1.06904200 |

|   |              |             |             |
|---|--------------|-------------|-------------|
| C | 2.37622000   | -2.41790600 | -0.37458200 |
| C | 3.20416500   | -1.67377800 | -1.41965200 |
| C | 1.27373100   | -0.32107700 | 0.21671600  |
| C | 2.09133800   | 0.42087800  | -0.84909900 |
| C | -0.06077000  | -2.37409300 | -0.27709100 |
| C | 4.57188200   | 0.28879600  | -0.74847300 |
| C | 5.60908400   | -0.44004500 | -0.07675400 |
| C | 6.81903200   | 0.18639900  | 0.38374300  |
| C | 7.01978000   | 1.58698600  | 0.12951100  |
| C | 6.06196300   | 2.28956600  | -0.58917400 |
| C | 4.90133700   | 1.65004100  | -1.08958400 |
| N | 5.61444100   | -1.69761800 | 0.29906900  |
| N | 7.53688600   | -0.69602400 | 1.02908700  |
| O | 6.80184000   | -1.87101900 | 0.96840900  |
| N | 8.17433500   | 2.24585000  | 0.58103000  |
| O | 8.29710400   | 3.46788900  | 0.34584900  |
| O | 9.03552100   | 1.59081100  | 1.20149400  |
| H | 2.93434500   | -2.47661700 | 0.56610800  |
| H | 2.15753900   | -3.42599300 | -0.72231500 |
| H | 2.68314200   | -1.70376500 | -2.38533500 |
| H | 4.17819500   | -2.14231200 | -1.53702100 |
| H | 0.30093600   | 0.16253800  | 0.28954400  |
| H | 1.77361800   | -0.24391700 | 1.18845500  |
| H | 6.23654300   | 3.33180200  | -0.81917600 |
| H | -2.18648600  | -1.87576500 | -1.82321200 |
| C | -8.25983900  | 1.04331500  | -0.02089400 |
| C | -7.19636900  | 0.85362300  | 0.86159500  |
| C | -6.92665000  | 0.04516700  | -1.80422700 |
| C | -8.08924700  | 0.61769200  | -1.38444900 |
| H | -7.27737100  | 1.15790000  | 1.89756400  |
| H | -6.82455200  | -0.26746300 | -2.83983800 |
| H | -8.89445400  | 0.75156600  | -2.09518100 |
| H | -4.51712800  | -1.06172100 | -2.36628600 |
| N | -9.43668200  | 1.61375300  | 0.37563000  |
| C | -10.52966000 | 1.80439500  | -0.56395300 |
| C | -9.59429900  | 2.04641200  | 1.75140400  |
| H | -11.36640600 | 2.26516000  | -0.04089800 |
| H | -10.24542800 | 2.46425100  | -1.39229500 |
| H | -10.58694200 | 2.47515200  | 1.88151000  |
| H | -8.85362700  | 2.81022600  | 2.02004800  |
| H | -10.87765100 | 0.85252900  | -0.98188800 |
| H | -9.48962800  | 1.20746800  | 2.45080100  |
| N | 4.10434800   | 2.33124300  | -1.93653700 |
| H | 2.26755800   | 1.44086500  | -0.51094600 |

|             |             |             |             |
|-------------|-------------|-------------|-------------|
| H           | 1.52608300  | 0.44682200  | -1.78830400 |
| H           | 3.40954900  | 1.85843200  | -2.49842700 |
| H           | 4.37292800  | 3.25458000  | -2.25107600 |
| <b>BCD4</b> |             |             |             |
| C           | 7.71943300  | 1.39090200  | -0.24238500 |
| C           | 4.63249800  | -1.80401100 | 1.78212700  |
| C           | 5.83997100  | -1.17720200 | 1.76472500  |
| C           | 5.51338000  | 1.05314900  | -1.23075300 |
| C           | 6.72886900  | 1.67863500  | -1.23661100 |
| H           | 8.11648000  | 0.18939400  | 1.50956600  |
| C           | 3.64549700  | -1.51195300 | 0.79287900  |
| C           | 6.15701700  | -0.20786500 | 0.75724500  |
| H           | 4.78462100  | 1.29253700  | -1.99740100 |
| H           | 6.93722800  | 2.40364100  | -2.01270900 |
| C           | 5.18810100  | 0.09567800  | -0.23928900 |
| C           | 3.94663100  | -0.57808600 | -0.18640900 |
| C           | 2.36062500  | -2.12357700 | 0.74786000  |
| O           | 3.03914100  | -0.27615000 | -1.15471300 |
| O           | 1.08956300  | -0.50029900 | -2.17115300 |
| C           | 1.44213000  | -1.78878500 | -0.19729100 |
| O           | 0.14399000  | -3.75713400 | -0.33001800 |
| C           | 1.78987900  | -0.83868700 | -1.23436300 |
| N           | -1.01439500 | -1.80759300 | -0.24439400 |
| N           | -3.35497400 | -0.72267700 | 0.94453600  |
| C           | -2.29650700 | -2.47129500 | -0.44606300 |
| C           | -3.24056600 | -2.16267400 | 0.71372600  |
| C           | -1.11661700 | -0.37594300 | -0.01508300 |
| C           | -2.05464800 | -0.08113800 | 1.16301200  |
| C           | 0.13544000  | -2.52362400 | -0.26467500 |
| C           | -4.50379100 | -0.02232400 | 0.73904100  |
| C           | -5.45411300 | -0.36641600 | -0.27920000 |
| C           | -6.59115500 | 0.45969100  | -0.58449200 |
| C           | -6.81070700 | 1.65584800  | 0.18200800  |
| C           | -5.94770000 | 1.95940400  | 1.22616000  |
| C           | -4.86395100 | 1.10919100  | 1.55631900  |
| N           | -5.42377400 | -1.37211100 | -1.12206300 |
| N           | -7.23099800 | -0.05462700 | -1.60249100 |
| O           | -6.51997200 | -1.19932300 | -1.93246000 |
| N           | -7.89002900 | 2.50751300  | -0.10140800 |
| O           | -8.03342200 | 3.54212100  | 0.58608800  |
| O           | -8.66571300 | 2.20423500  | -1.02981800 |
| H           | -2.73884200 | -2.12129800 | -1.38513300 |
| H           | -2.12670600 | -3.54460300 | -0.51140700 |
| H           | -2.84023800 | -2.60258600 | 1.63628700  |

|   |             |             |             |
|---|-------------|-------------|-------------|
| H | -4.22382000 | -2.58706100 | 0.52610100  |
| H | -0.13935500 | 0.03976300  | 0.22440000  |
| H | -1.49046200 | 0.11629500  | -0.91943100 |
| H | -2.17970600 | 0.99700700  | 1.25043400  |
| H | -1.61035400 | -0.46667700 | 2.08835800  |
| H | -6.14187200 | 2.83295800  | 1.83368300  |
| H | 2.10942700  | -2.87284600 | 1.49395000  |
| H | 4.39842000  | -2.53689400 | 2.54841000  |
| H | 6.58620500  | -1.40422300 | 2.52011700  |
| C | 7.40190600  | 0.44390700  | 0.73676300  |
| C | 9.92496800  | 1.71393200  | 0.74087600  |
| C | 9.23635400  | 3.00073900  | -1.30053200 |
| H | 10.81564600 | 2.31466400  | 0.56235500  |
| H | 9.56061600  | 1.93587500  | 1.75163100  |
| H | 10.21342200 | 0.65576000  | 0.70517100  |
| H | 10.23814500 | 3.39199700  | -1.12900200 |
| H | 9.21557400  | 2.55150900  | -2.30084600 |
| H | 8.53801600  | 3.84573600  | -1.28534700 |
| N | -4.17357600 | 1.35508000  | 2.68728700  |
| H | -3.55459400 | 0.66198700  | 3.08525700  |
| H | -4.47265300 | 2.09273100  | 3.31175100  |
| N | 8.92752500  | 2.02895200  | -0.26477900 |

### **BCD-H<sub>2</sub>S**

|   |             |             |             |
|---|-------------|-------------|-------------|
| C | 4.28491600  | -2.59086100 | 0.08669500  |
| C | 3.06146700  | -1.93759200 | -0.10379500 |
| C | 2.95192600  | -0.54949100 | 0.01349100  |
| C | 4.12020200  | 0.20578300  | 0.33526200  |
| C | 5.34081400  | -0.47354000 | 0.52520800  |
| C | 5.42364900  | -1.85708100 | 0.40193800  |
| H | 4.33603900  | -3.66979000 | -0.01261000 |
| H | 2.19190000  | -2.53632700 | -0.34724500 |
| C | 1.68547500  | 0.14137700  | -0.18176300 |
| C | 4.04458100  | 1.61110400  | 0.45885600  |
| H | 6.22778200  | 0.10288400  | 0.77152900  |
| H | 6.37468000  | -2.35712300 | 0.55202700  |
| C | 2.83594600  | 2.28538700  | 0.26184600  |
| C | 1.69752200  | 1.57830000  | -0.05097600 |
| H | 4.93987000  | 2.17281100  | 0.70597100  |
| H | 2.77942400  | 3.36501700  | 0.34642900  |
| C | 0.47305400  | -0.47630200 | -0.46941500 |
| O | 0.56318200  | 2.30225600  | -0.26250300 |
| O | -1.58745400 | 2.49553100  | -0.71498600 |
| C | -0.71857300 | 0.28050500  | -0.56898800 |
| O | -1.87270100 | -1.28928400 | -1.86459600 |

|   |             |             |             |
|---|-------------|-------------|-------------|
| C | -0.67289100 | 1.70621900  | -0.52375900 |
| C | -1.96071500 | -0.42882500 | -0.96745100 |
| N | -3.13475300 | -0.14254800 | -0.35916900 |
| N | -5.31763400 | -0.63407600 | 1.36686400  |
| C | -4.38423400 | -0.69693100 | -0.87719800 |
| C | -5.11025900 | -1.48934900 | 0.20133400  |
| C | -3.28757500 | 0.63185900  | 0.86958600  |
| C | -4.03984600 | -0.18841700 | 1.91302600  |
| H | -5.84431600 | -1.13363800 | 2.07785700  |
| H | -4.15121000 | -1.32497900 | -1.73499200 |
| H | -5.01898700 | 0.13602200  | -1.20642400 |
| H | -4.51742000 | -2.38735100 | 0.44737200  |
| H | -6.08061600 | -1.81743300 | -0.18210100 |
| H | -4.22235200 | 0.43656000  | 2.79197100  |
| H | -3.40456500 | -1.03658800 | 2.22285400  |
| H | -3.83508100 | 1.55473500  | 0.64833100  |
| H | -2.30593400 | 0.89816600  | 1.25685500  |
| H | 0.40053900  | -1.54748900 | -0.59837500 |

#### BCD1-H<sub>2</sub>S

|   |             |             |             |
|---|-------------|-------------|-------------|
| C | -4.23079900 | 1.56151800  | 0.16875100  |
| C | -2.91057300 | 1.09846800  | -0.03495800 |
| C | -2.61416000 | -0.25682900 | 0.04226800  |
| C | -3.65640900 | -1.18810800 | 0.33304200  |
| C | -4.97695400 | -0.68610400 | 0.53418500  |
| C | -5.26412900 | 0.65129600  | 0.45504700  |
| H | -2.13106500 | 1.81454700  | -0.25157300 |
| C | -1.24789100 | -0.74356400 | -0.16859200 |
| C | -3.37581900 | -2.55459600 | 0.41593100  |
| H | -5.76997000 | -1.39423000 | 0.75530500  |
| H | -6.26892200 | 1.02876300  | 0.60812900  |
| C | -2.06617700 | -3.03098400 | 0.20742200  |
| C | -1.04667900 | -2.15460700 | -0.07625600 |
| H | -4.17232100 | -3.25646900 | 0.63998700  |
| H | -1.85030400 | -4.09237900 | 0.26373500  |
| C | -0.14706700 | 0.06171000  | -0.43799200 |
| O | 0.19468500  | -2.69667900 | -0.29682500 |
| O | 2.34756800  | -2.55340000 | -0.75985500 |
| C | 1.14669600  | -0.50232900 | -0.55996400 |
| O | 2.02928500  | 1.27810000  | -1.80206700 |
| C | 1.31992000  | -1.91876900 | -0.54715200 |
| C | 2.25720600  | 0.40296300  | -0.94324300 |
| N | 3.47332000  | 0.27846700  | -0.35908300 |
| N | 5.57159600  | 1.06412700  | 1.36483800  |
| C | 4.61432800  | 1.03486700  | -0.87008900 |

|   |             |             |             |
|---|-------------|-------------|-------------|
| C | 5.21902700  | 1.90473400  | 0.22359500  |
| C | 3.76047100  | -0.49345500 | 0.84623800  |
| C | 4.38585300  | 0.40785500  | 1.90678200  |
| H | 6.01935100  | 1.62334500  | 2.08547700  |
| H | 4.27642800  | 1.64016200  | -1.70911300 |
| H | 5.36912200  | 0.32104800  | -1.22533400 |
| H | 4.49475900  | 2.69136600  | 0.49780000  |
| H | 6.12124700  | 2.39175500  | -0.15746400 |
| H | 4.67440100  | -0.20280300 | 2.76726900  |
| H | 3.62844600  | 1.13712600  | 2.24399900  |
| H | 4.44430100  | -1.31229400 | 0.59681700  |
| H | 2.83775000  | -0.92214500 | 1.23217800  |
| H | -0.23688400 | 1.13440400  | -0.54090300 |
| O | -4.57813600 | 2.84708300  | 0.10734900  |
| C | -3.59717700 | 3.84958400  | -0.17771400 |
| H | -3.15032400 | 3.68121800  | -1.16092800 |
| H | -4.13991100 | 4.79262300  | -0.17494400 |
| H | -2.82574500 | 3.86307400  | 0.59665000  |

#### BCD2-H<sub>2</sub>S

|   |             |             |             |
|---|-------------|-------------|-------------|
| C | 4.09900500  | -1.07519000 | 0.11997900  |
| C | 2.73332900  | -0.69228600 | -0.06364900 |
| C | 2.32031600  | 0.62612400  | 0.02520800  |
| C | 3.28004500  | 1.64752400  | 0.31097500  |
| C | 4.64467600  | 1.24910400  | 0.49443800  |
| C | 5.05159600  | -0.04683900 | 0.40573300  |
| H | 2.00724400  | -1.46100100 | -0.27898500 |
| C | 0.91527600  | 0.98651800  | -0.16944500 |
| C | 2.88401300  | 2.98386200  | 0.40327300  |
| H | 5.37577300  | 2.02223300  | 0.71275100  |
| H | 6.09479500  | -0.29012200 | 0.55357500  |
| C | 1.53564000  | 3.33216200  | 0.20892500  |
| C | 0.59375500  | 2.36074300  | -0.06927500 |
| H | 3.61680300  | 3.75314400  | 0.62127900  |
| H | 1.21840200  | 4.36798900  | 0.27114600  |
| C | -0.11599800 | 0.08670200  | -0.43368300 |
| O | -0.69850600 | 2.79014300  | -0.27003600 |
| O | -2.83231900 | 2.46941900  | -0.73360900 |
| C | -1.45333100 | 0.52777200  | -0.55294400 |
| O | -2.17642900 | -1.35327500 | -1.76742100 |
| C | -1.75233800 | 1.92041100  | -0.52772200 |
| C | -2.47549000 | -0.47538800 | -0.93234900 |
| N | -3.70840300 | -0.44098500 | -0.36230400 |
| N | -5.72452000 | -1.42258200 | 1.36332300  |
| C | -4.77876300 | -1.29335800 | -0.87284200 |

|   |             |             |             |
|---|-------------|-------------|-------------|
| C | -5.29902800 | -2.22147900 | 0.21651800  |
| C | -4.06559800 | 0.29822800  | 0.84382400  |
| C | -4.60376700 | -0.65886800 | 1.90365200  |
| H | -6.11321800 | -2.02513500 | 2.08335800  |
| H | -4.39242300 | -1.86097800 | -1.71714000 |
| H | -5.59746100 | -0.64862100 | -1.21924700 |
| H | -4.50476300 | -2.93958000 | 0.48527700  |
| H | -6.15400900 | -2.78755600 | -0.16458800 |
| H | -4.94662800 | -0.07981800 | 2.76625500  |
| H | -3.78133600 | -1.31540900 | 2.23845300  |
| H | -4.82349700 | 1.05029500  | 0.59713100  |
| H | -3.18761300 | 0.81142700  | 1.22995900  |
| H | 0.06993200  | -0.97369400 | -0.54040200 |
| N | 4.46542700  | -2.36560000 | 0.02550800  |
| C | 3.48668000  | -3.41103500 | -0.25942700 |
| C | 5.86120000  | -2.75043900 | 0.21062000  |
| H | 3.00781300  | -3.24447000 | -1.22915100 |
| H | 3.99577300  | -4.37127200 | -0.28712900 |
| H | 2.71780200  | -3.44908200 | 0.51837400  |
| H | 5.95164700  | -3.82662500 | 0.08596500  |
| H | 6.50052600  | -2.25890900 | -0.52902100 |
| H | 6.20763600  | -2.48456100 | 1.21413600  |

### BCD3-H<sub>2</sub>S

|   |             |             |             |
|---|-------------|-------------|-------------|
| C | 1.37579100  | -1.57730200 | -0.12821400 |
| C | 2.67896500  | -1.12460500 | -0.00224300 |
| C | 0.28374900  | -0.67767300 | -0.34365300 |
| C | 2.95491700  | 0.28327600  | -0.08749700 |
| C | 1.86097600  | 1.19172500  | -0.30564700 |
| C | 0.58875700  | 0.71581100  | -0.42772600 |
| H | 2.04869800  | 2.25805300  | -0.37744800 |
| C | -1.05485800 | -1.05696900 | -0.47348000 |
| O | -0.40800400 | 1.62221300  | -0.64746300 |
| O | -2.50637400 | 2.21889100  | -1.02284500 |
| C | -2.07514800 | -0.10186700 | -0.63831700 |
| O | -3.62297800 | -1.55175600 | -1.65688900 |
| C | -1.75297200 | 1.27766200  | -0.77689900 |
| N | -4.50283100 | -0.00408500 | -0.24729000 |
| N | -6.58561900 | 0.14631100  | 1.65909100  |
| C | -5.87428200 | -0.35102600 | -0.61233100 |
| C | -6.64304600 | -0.85834600 | 0.60012600  |
| C | -4.40296000 | 0.92145400  | 0.87681900  |
| C | -5.20414000 | 0.39169300  | 2.06229500  |
| C | -3.45790100 | -0.59223200 | -0.87948100 |
| H | -6.36573300 | 0.55012200  | -1.00222400 |



|   |             |             |             |
|---|-------------|-------------|-------------|
| H | -5.84035000 | -1.10407900 | -1.39732200 |
| H | -6.21115500 | -1.82219600 | 0.92114900  |
| H | -7.68721100 | -1.02965200 | 0.32284100  |
| H | -3.35936300 | 1.03454000  | 1.16319200  |
| H | -4.78526600 | 1.90205300  | 0.57211600  |
| H | -5.19064700 | 1.13678500  | 2.86315800  |
| H | -4.71591900 | -0.52407000 | 2.43960200  |
| H | -1.32289100 | -2.10719200 | -0.43275000 |
| C | 5.35467300  | -0.14017500 | 0.24943700  |
| C | 4.25172500  | 0.74857500  | 0.03583700  |
| C | 3.79585100  | -1.99935900 | 0.21431300  |
| C | 5.07615600  | -1.53819400 | 0.33571100  |
| H | 4.42510300  | 1.81479000  | -0.03311900 |
| H | 3.60639000  | -3.06681500 | 0.28264000  |
| H | 5.87886500  | -2.24499100 | 0.49752400  |
| H | 1.16332000  | -2.64051400 | -0.06326200 |
| N | 6.61026200  | 0.34076700  | 0.36271200  |
| C | 7.72615300  | -0.56951900 | 0.58252200  |
| C | 6.88192800  | 1.77143200  | 0.27105100  |
| H | 8.64677900  | 0.00529400  | 0.65052300  |
| H | 7.59515300  | -1.13008100 | 1.51435500  |
| H | 7.95186900  | 1.93355800  | 0.37886400  |
| H | 6.36724700  | 2.32159300  | 1.06536800  |
| H | -7.13233300 | -0.15858900 | 2.45955400  |
| H | 7.81887300  | -1.28064900 | -0.24550300 |
| H | 6.56872500  | 2.17014800  | -0.69901100 |

#### **BCD4-H<sub>2</sub>S**

|   |             |             |             |
|---|-------------|-------------|-------------|
| C | -1.10260000 | 2.54802000  | 0.39034200  |
| C | -2.43762800 | 2.34760700  | 0.53243100  |
| C | -0.23138000 | 1.49173900  | -0.03582200 |
| C | -3.03256600 | 1.06144000  | 0.25693000  |
| C | -2.18405700 | -0.01257900 | -0.18019600 |
| C | -0.82693100 | 0.22241300  | -0.31608600 |
| C | 1.14872400  | 1.63344200  | -0.17320400 |
| O | -0.05090200 | -0.81883100 | -0.76609800 |
| O | 1.88110900  | -1.72582300 | -1.32414800 |
| C | 1.94633400  | 0.52303000  | -0.52964300 |
| O | 3.75863300  | 1.78457300  | -1.33243000 |
| C | 1.33584100  | -0.71746100 | -0.88588000 |
| C | 3.39732800  | 0.74623000  | -0.74379400 |
| N | 4.30013500  | -0.15887300 | -0.28890400 |
| N | 6.33938600  | -1.10732200 | 1.42557300  |
| C | 5.70623900  | -0.04898700 | -0.66978500 |
| C | 6.59550200  | 0.04318200  | 0.56270300  |

|   |             |             |             |
|---|-------------|-------------|-------------|
| C | 4.02138700  | -1.23386700 | 0.65785200  |
| C | 4.94751100  | -1.12091400 | 1.86510800  |
| H | 6.95781900  | -1.08388500 | 2.23149600  |
| H | 5.82210700  | 0.82949900  | -1.30175600 |
| H | 5.97838600  | -0.94303200 | -1.24656200 |
| H | 6.39618000  | 0.99869900  | 1.07835700  |
| H | 7.64513500  | 0.03584500  | 0.25484600  |
| H | 4.78579700  | -1.98223500 | 2.51986600  |
| H | 4.68476000  | -0.20891500 | 2.42953800  |
| H | 4.16476500  | -2.20034100 | 0.16177200  |
| H | 2.98635100  | -1.16833000 | 0.98746900  |
| H | 1.62193000  | 2.58927100  | 0.01883500  |
| C | -4.39201800 | 0.85401300  | 0.40325000  |
| C | -2.79904100 | -1.28037000 | -0.45785800 |
| C | -4.14121400 | -1.47184900 | -0.31050700 |
| C | -4.99438100 | -0.40990600 | 0.12773700  |
| H | -5.00415400 | 1.68351900  | 0.73416900  |
| H | -2.17331400 | -2.10050900 | -0.79066000 |
| H | -4.55881400 | -2.44538100 | -0.53034300 |
| H | -0.66443200 | 3.51859500  | 0.60215200  |
| H | -3.08362200 | 3.15712100  | 0.85858400  |
| N | -6.32654500 | -0.59143900 | 0.27594000  |
| C | -6.92996800 | -1.88366000 | -0.01790800 |
| C | -7.18298700 | 0.49723000  | 0.72855900  |
| H | -7.14827500 | 1.34239400  | 0.03267100  |
| H | -8.20898500 | 0.14015300  | 0.78334700  |
| H | -6.88499700 | 0.84560000  | 1.72328700  |
| H | -6.51515500 | -2.66741100 | 0.62552500  |
| H | -8.00147100 | -1.82380400 | 0.15916100  |
| H | -6.76614600 | -2.16529800 | -1.06398400 |

## References

1. Y. Luo, P. Norman, P. Macak and H. Ågren, *J. Phys. Chem. A*, 2000, **104**, 4718-4722.
2. J. Olsen and P. Jørgensen, *J. Chem. Phys.*, 1985, **82**, 3235-3264.
3. P. R. Monson and W. M. McClain, *J. Chem. Phys.*, 1970, **53**, 29-37.
4. E. Rudberg, P. Salek, T. Helgaker and H. Ågren, *J. Chem. Phys.*, 2005, **123**, 184108.
